# Supplementary material
Source: PubMed Central journal article supplement (PMC6544362)
Supplement: NIHMS986663-supplement-Supp_info.pdf [file NIHMS986663-supplement-Supp_info.pdf]

# Supporting Information

## Documenting and Harnessing the Biological Potential of Molecules in Distributed Drug Discovery (D3) Virtual Catalogs

Milata M. Abraham<sup>1</sup> | Ryan E. Denton<sup>1</sup> | Richard W. Harper<sup>1</sup> | William L. Scott<sup>1</sup>, | Martin J. O'Donnell<sup>1,\*</sup> | Jacob D. Durrant<sup>2,\*</sup>

<sup>1</sup>Department of Chemistry and Chemical Biology, Indiana University Purdue University Indianapolis, Indianapolis, Indiana 46202, United States

<sup>2</sup>Department of Biological Sciences, University of Pittsburgh, Pittsburgh, Pennsylvania, 15260, United States

Correspondence: Jacob D. Durrant, [durrantj@pitt.edu](mailto:durrantj@pitt.edu); Martin J. O'Donnell, [modonnel@iupui.edu](mailto:modonnel@iupui.edu)

# Table of Contents

|                                                                                                                                                                                              |       |
|----------------------------------------------------------------------------------------------------------------------------------------------------------------------------------------------|-------|
| Title Page.....                                                                                                                                                                              | SI-1  |
| Table of Contents.....                                                                                                                                                                       | SI-2  |
| Workflow Diagrams.....                                                                                                                                                                       | SI-3  |
| Figures SI-1 and SI-2                                                                                                                                                                        |       |
| Stereochemical Issues in the Enumeration of N-Acyl $\alpha$ -Amino Acid Derivatives.....                                                                                                     | SI-4  |
| Figures SI-3 and SI-4                                                                                                                                                                        |       |
| Identifying Unique D3 Compounds Listed as Actives in PubChem.....                                                                                                                            | SI-6  |
| Figures SI-5, SI-6, SI-7 and SI-8                                                                                                                                                            |       |
| Table SI-1. 40 Approved drugs containing substructures of various D3-like<br>$\alpha$ -amino acid and dipeptide derivatives.....                                                             | SI-12 |
| Table SI-2. 32 protein drug targets with orthosteric pockets known to bind at least one D3<br>$\alpha$ -amino acid derivative. ....                                                          | SI-18 |
| Table SI-3. 54 D3 Compounds identified as hits when only PubChem assays<br>judged likely to detect binding to the orthosteric pockets of single-protein drug<br>targets were considered..... | SI-20 |
| References.....                                                                                                                                                                              | SI-26 |

## Workflow Diagrams

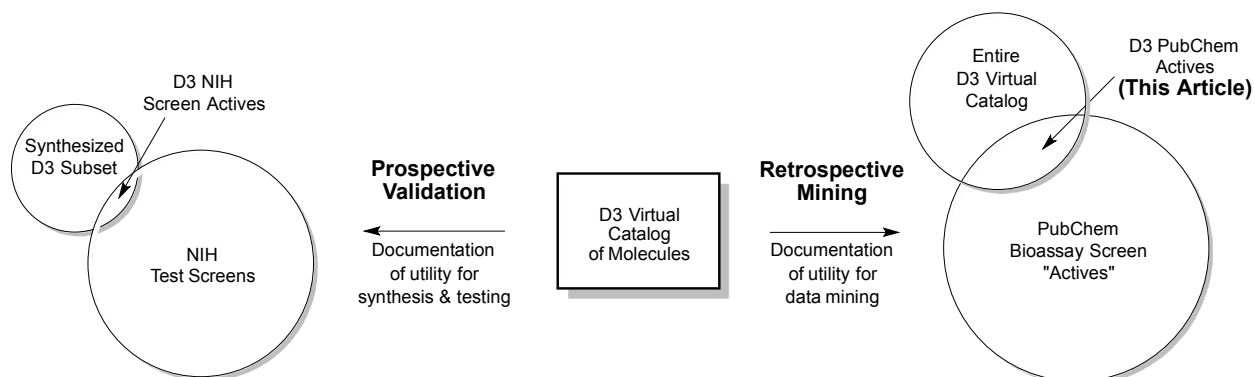

**Figure SI-1.** Two approaches for demonstrating the potential for biological activity of D3 virtual catalog members.

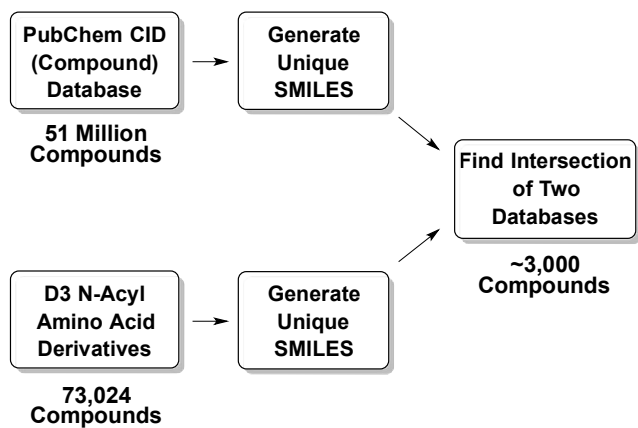

**Figure SI-2.** The cheminformatics analysis. Common D3 virtual and bioactive PubChem compounds.

## Stereochemical Issues in the Enumeration of N-Acyl $\alpha$ -Amino Acid Derivatives

Enumeration with the 100 electrophiles (alkyl halides and Michael acceptors) and 100 carboxylic acids gave 24,416 N-acyl amino acids **1** [1], 24,192 N-acyl amino acid methyl esters **2** [2], and 24,416 N-acyl amino acid amides **3** (presented here for the first time [3] (Figure SI-3). The reason these numbers exceed 10,000 (100 electrophiles x 100 carboxylic acids) is discussed below (taken in part from reference [1], Supporting Information, p. 4).

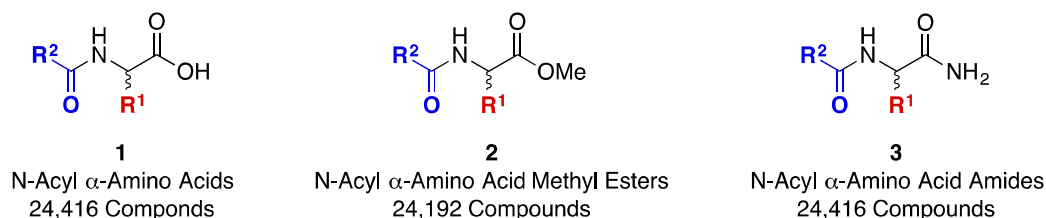

**Figure SI-3 (Figure 1 from article).** Generic structures of the 73,024 unnatural and natural N-acyl  $\alpha$ -amino acid derivatives in the D3 virtual catalog

Issues of stereochemistry were addressed in this enumeration. Examples illustrating possible N-acylated amino acid products **1** are shown in Figure SI-4. The products are identified in three ways: row/column (e.g. **Aa**), Collaborative Drug Discovery (CDD) number (e.g. DDD-000002150), and the number used in our *J. Comb. Chem.* paper [e.g. (*R*)-{9}119] [1, 2]. The diversity elements (reactants  $R^1X$  and  $R^2CO_2H$ ) include achiral (**a** and **A**), optically pure (**B**), racemic (**b** and **C**), and prochiral (**c**) examples. Only one of the possible stereoisomers for each product is shown in this figure.

(1) When achiral or optically pure reactants ( $R^1X$  and  $R^2CO_2H$ ) were used, racemic products (2 stereoisomers) resulted. Examples: **Aa** and its enantiomer or **Ba** and its diastereomer at the  $\alpha$  carbon. The database contains 15,308 unique molecules **1** (7,654 pairs) of this class.

(2) When one of the reactants ( $R^1X$  and  $R^2CO_2H$ ) was racemic or, in the case of Michael acceptors, prochiral, 4 stereoisomers were obtained. Examples: **Ab** or **Ac** and their stereoisomers. Other cases yielding 4 stereoisomers: optically pure and racemic (**Bb**); optically pure and prochiral (**Bc**); or racemic and achiral (**Ca**). The database contains 8,068 such unique molecules **1** (2,017 sets of four stereoisomers) of this class.

(3) When both reactants ( $R^1X$  and  $R^2CO_2H$ ) were racemic or prochiral and racemic, 8 stereoisomers were formed. Examples: **Cb** or **Cc** and their stereoisomers. The database contains 1,040 such unique molecules **1** (130 sets of eight stereoisomers) of this class.

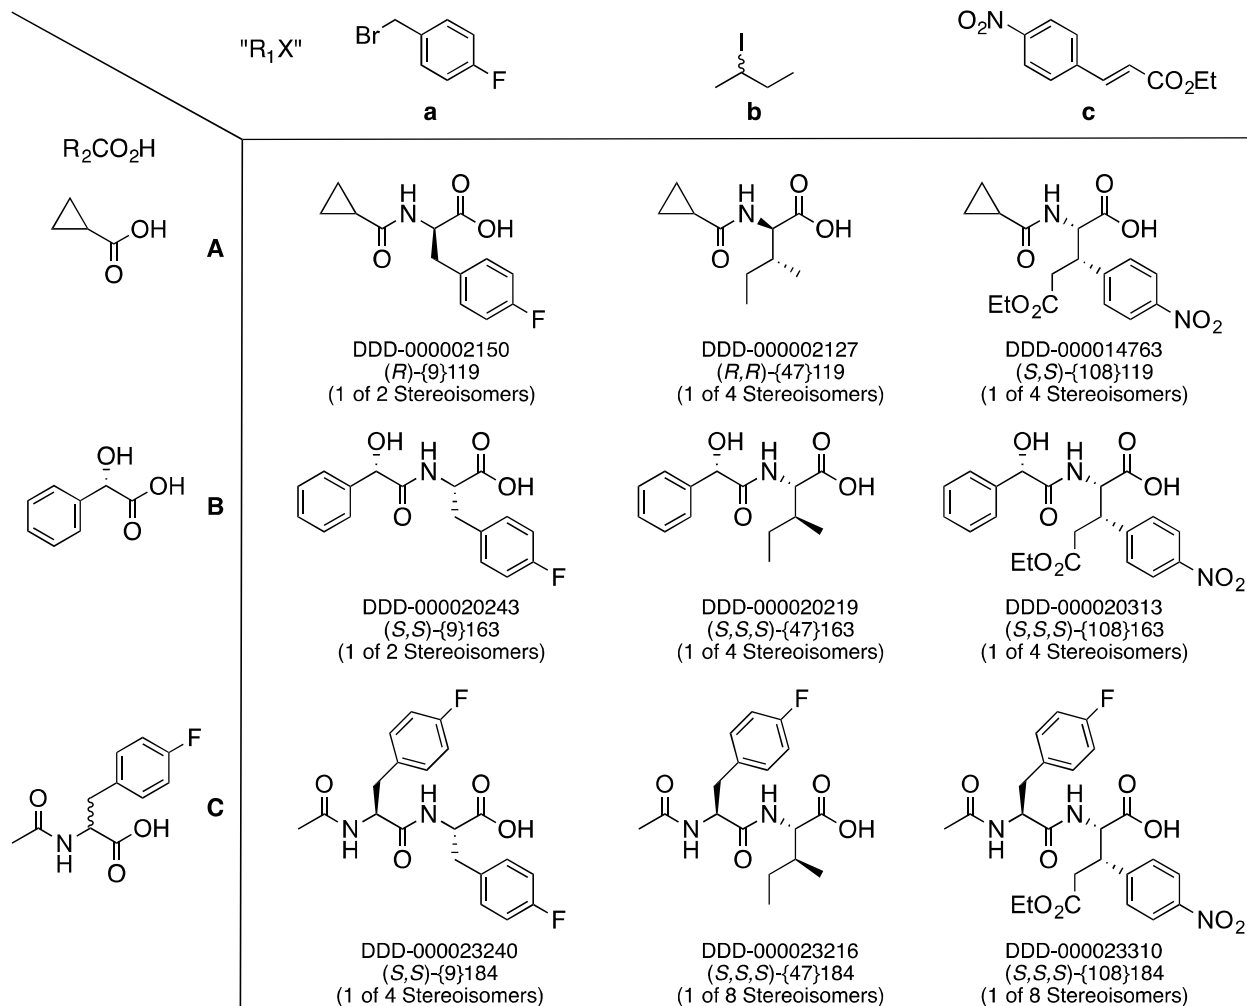

**Figure SI-4.** Sample enumerated compounds demonstrating different stereochemical issues.

## Identifying Unique D3 Compounds Listed as Actives in PubChem

A series of Boolean substructure searches was used to identify all D3-like N-acyl  $\alpha$ -amino acid derivatives (**A**, **B**, or **C**) and N-acyl dipeptide derivatives (**D**, **E**, or **F**) present in PubChem (i.e., "PC-CID" compounds in Supporting Information Figures SI-3, SI-4, SI-5, and SI-6). Current D3 catalog members do not contain glycine or  $\alpha,\alpha$ -disubstituted compounds, so the  $\alpha$ -positions of substructures **A-F** were substituted with both an  $\alpha$ -carbon and an  $\alpha$ -hydrogen. Since the maximum molecular weight of the D3 catalog compounds is 685 daltons, the PubChem searches were limited to compounds with molecular weights less than 750 daltons. Low-weight dipeptides were not explicitly excluded from this search because they are accessible through existing D3 chemistry, when  $\alpha$ -amino acid derivatives are used as N-acylating agents ( $R^2CO_2H$ ).

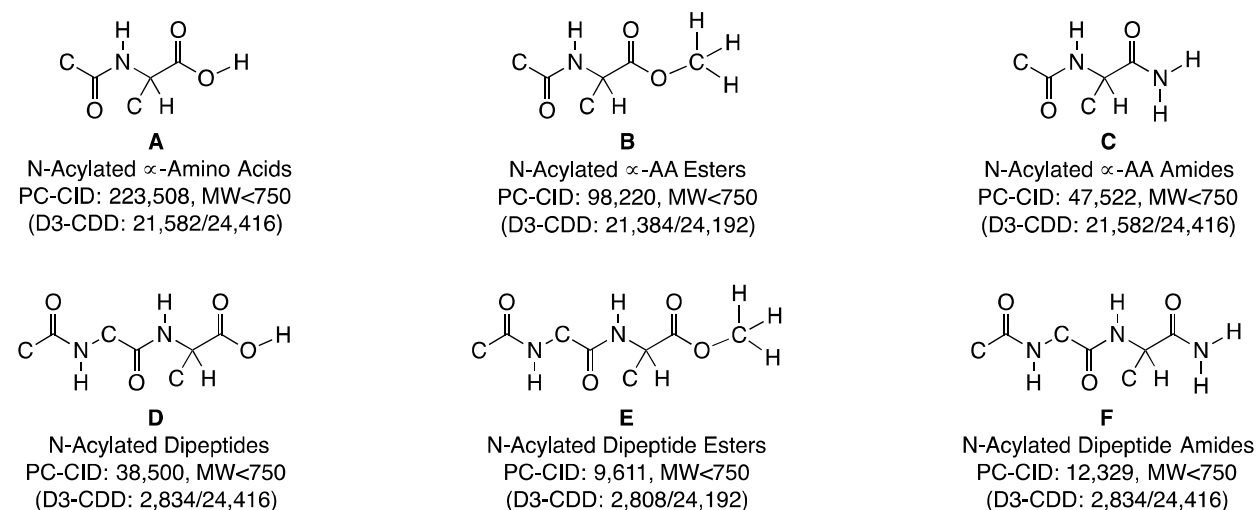

**Figure SI-5.** PubChem and D3-catalog substructure searches refined by subsequent Boolean searches to identify *only* N-acyl  $\alpha$ -amino acid derivatives **A-C** and N-acyl dipeptide derivatives **D-F**. PC-CID is the number of PubChem compounds that meet the search parameters. D3-CDD indicates the fraction of D3 compounds (out of the total number of D3 compounds with the specified substructure) in the Collaborative Drug Discovery/D3 dataset (see the following Figures SI-6, SI-7, and SI-8 for Boolean search strategies).

## Substructure SMILES & Boolean Searches - Acids

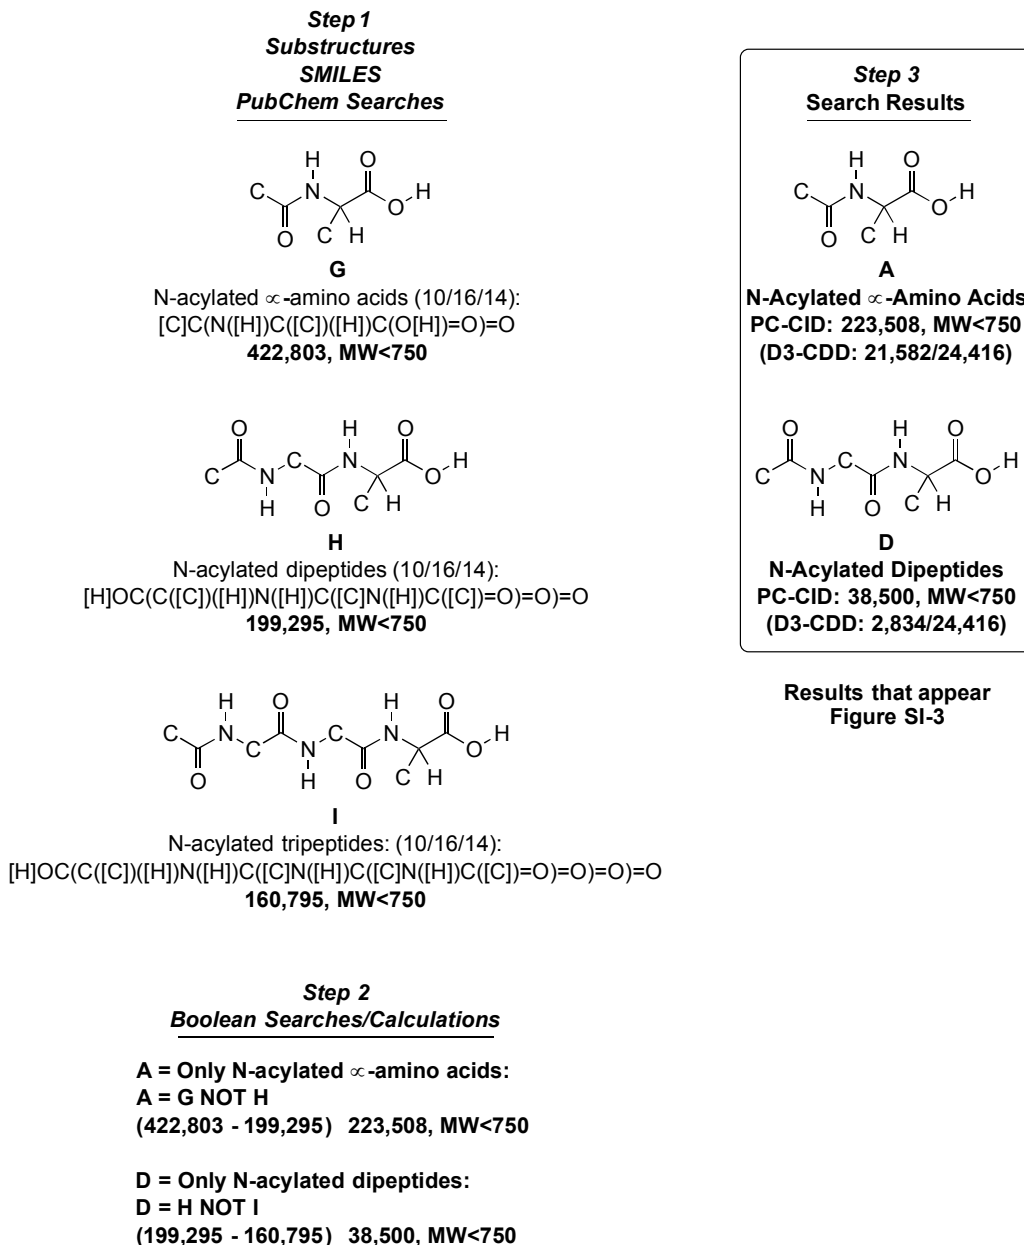

**Figure SI-6.** Boolean substructure searches using SMILES strings identified all D3-like N-acyl  $\alpha$ -amino acids **A** and N-acyl dipeptides **D** in PubChem (Figure SI-5). Current D3 catalog members do not contain glycine or  $\alpha,\alpha$ -disubstituted compounds, so the  $\alpha$ -positions of substructures **A** and **D** were substituted with both an  $\alpha$ -carbon and an  $\alpha$ -hydrogen. Since the maximum molecular weight of the D3 catalog compounds is 685 daltons, the PubChem searches were limited to compounds with molecular weights less than 750 daltons.

## Substructure SMILES & Boolean Searches - Esters

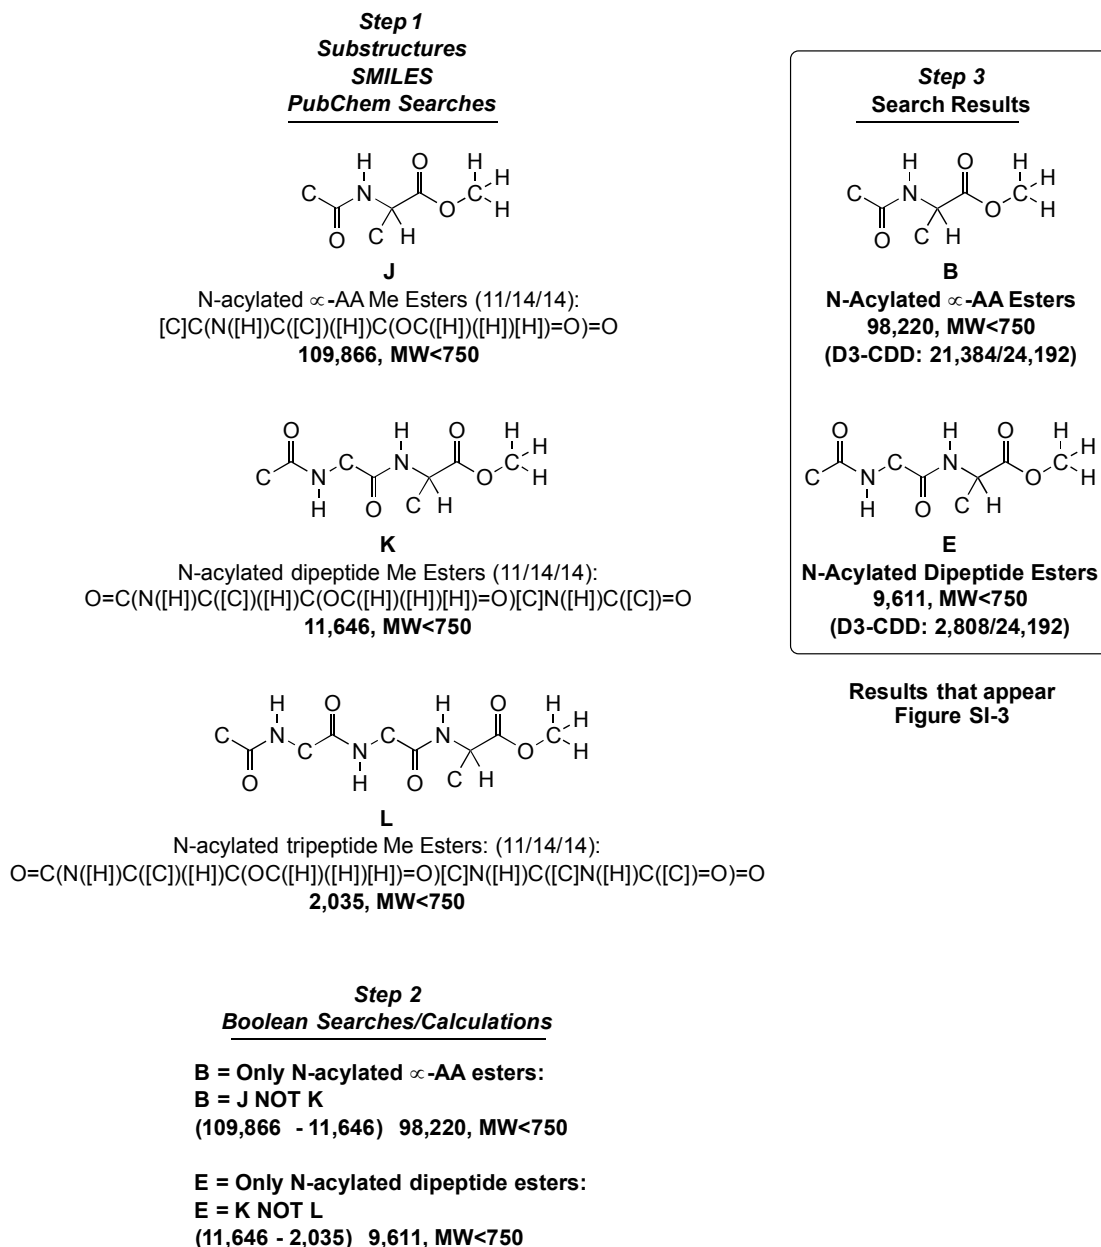

**Figure SI-7.** Boolean substructure searches using SMILES strings were conducted to identify all D3-like N-acyl  $\alpha$ -amino acids methyl esters **B** and N-acyl dipeptide methyl esters **E** in PubChem (Figure SI-5). Current D3 catalog members do not contain glycine or  $\alpha,\alpha$ -disubstituted compounds, so the  $\alpha$ -positions of substructures **B** and **E** were substituted with both an  $\alpha$ -carbon and an  $\alpha$ -hydrogen. Since the maximum molecular weight of the D3 catalog compounds is 685 daltons, the PubChem searches were limited to compounds with molecular weights less than 750 daltons.



## Substructure SMILES & Boolean Searches - Amides

**Step 1**  
**Substructures**  
**SMILES**  
**PubChem Searches**

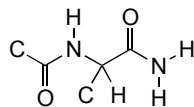

**M**

N-acylated  $\alpha$ -AA Me amides (11/14/14):  
[C]C(N([H])C([C])([H])C(N([H])[H])=O)=O  
**68,883, MW<750**

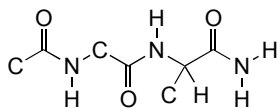

**N**

N-acylated dipeptide Me amides (11/14/14):  
[H]N([H])C(C([C])([H])N([H])C([C]N([H])C([C])=O)=O)=O  
**21,361, MW<750**

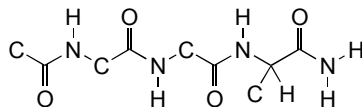

**O**

N-acylated tripeptide amides: (11/14/14):  
[H]N([H])C(C([C])([H])N([H])C([C]N([H])C([C]N([H])C([C])=O)=O)=O)=O  
**9,032, MW<750**

**Step 2**  
**Boolean Searches/Calculations**

**C = Only N-acylated  $\alpha$ -AA amides:**  
**C = M NOT N**  
**(68,883 - 21,361) 47,522, MW<750**

**F = Only N-acylated dipeptide amides:**  
**F = N NOT O**  
**(21,361 - 9,032) 12,329, MW<750**

**Step 3**  
**Search Results**

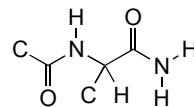

**C**

**N-Acylated  $\alpha$ -AA Amides**  
**47,522, MW<750**  
**(D3-CDD: 21,582/24,416)**

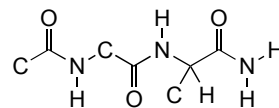

**F**

**N-Acylated Dipeptide Amides**  
**12,329, MW<750**  
**(D3-CDD: 2,834/24,416)**

**Results that appear**  
**Figure SI-3**

**Figure SI-8.** Boolean substructure searches using SMILES strings were conducted to identify all D3-like N-acyl  $\alpha$ -amino acid amides **C** and N-acyl dipeptide methyl amides **F** in PubChem (Figure SI-5). Current D3 catalog members do not contain glycine or  $\alpha,\alpha$ -disubstituted compounds, so the  $\alpha$ -positions of substructures **C** and **F** were substituted with both an  $\alpha$ -carbon and an  $\alpha$ -hydrogen. Since the maximum molecular weight of the D3 catalog compounds is 685 daltons, the PubChem searches were limited to compounds with molecular weights less than 750 daltons.

This limited set of D3-like PubChem compounds was next searched for exact D3 matches. A list of all D3 compounds can be obtained from either the Collaborative Drug (CDD) or Durrant Lab websites (<https://www.collaborativedrug.com> [4, 5], accessed February 27, 2017; or [http://durrantlab.com/liglib/iupui/d3\\_docking/](http://durrantlab.com/liglib/iupui/d3_docking/), accessed February 27, 2017). Included in this comparison were the 2,834, 2,808, and 2,834 dipeptide derivatives present in the “D3-CDD” N-acyl dipeptide (**D**), D3 N-acyl dipeptide methyl ester (**E**), and D3 N-acyl dipeptide amide (**F**) sets, respectively.

As PubChem does not consistently report chirality, structural information related to the stereochemistry of both the PubChem and D3 compounds was ignored for the purpose of this comparison. Since epimeric pairs are always present in the D3 catalog, ignoring chirality did not impact the total number of compounds ultimately identified. By all these search criteria, and ignoring chirality, ~3,000 PubChem compounds were present in the D3 virtual catalog, excluding those that had been specifically uploaded by D3 or CDD (June 2014).

PubChem substructure searches were performed using the SMILES strings derived from substructures **1** - **3** (Figure SI-3) “CC(N([H])CC(O[H])=O)=O” (**1**), “CC(N([H])CC(OC([H])([H])[H])=O)=O” (**2**), and “CC(N([H])CC(N([H])[H])=O)=O” (**3**). The SMILES strings of these compounds were downloaded from the PubChem servers. Structural information related to stereochemistry was removed by applying the regex expressions “s/@[@H]\*/]/g” and “s/@//g” to the SMILES strings. If appropriate, isotopic information and explicitly specified heavy hydrogen atoms were removed using the “s/[0-9]\*/]/g”, “s/[H]//g”, and “s/[(\.)/\1/g” expressions. To ensure consistent charge assignments, nitrogen, carbon, oxygen, sulfur, and phosphorus atoms with non-neutral formal charges were converted to simple atoms with charge unspecified, using the “s/[NH[0-9]?[+]]/N/g”, “s/[N-]/N/g”, “s/[n-]/n/g”, “s/[CH[0-9]?[+]]/C/g”, “s/[C-]/C/g”, “s/[C+]/C/g”, “s/[c+]/c/g”, “s/[c-]/c/g”, “s/[OH[0-9]?[+]]/O/g”, “s/[O-]/O/g”, “s/[S-]/S/g”, “s/[S+]/S/g”, “s/[SH[0-9]?[+]]/S/g”, and “s/[P+]/P/g” expressions.

As a given compound can have multiple valid SMILES representations, we used the Open Babel computer program [6] to convert each SMILES string into a unique canonical form. Open Babel was also used to remove hydrogen atoms, convert dative bonds (e.g. [N+][O-]=O to N(=O)=O), and discard all but the largest molecule associated with each

string. The N-acyl  $\alpha$ -amino acids, esters, and amides of the D3 enumerated virtual catalog were subjected to the same protocol.

Since there is only one valid canonical SMILES string for a given compound, SMILES strings in this form serve as unique molecular identifiers and so can be used to identify compounds common to both the PubChem and D3 lists. We used the Unix command line for this purpose, but a similar protocol is possible with popular spreadsheet programs. For example, the unique SMILES strings in the PubChem and D3 lists could be identified using Microsoft Excel's advanced data filter ("Unique records only"). The lists of unique PubChem and D3 SMILES strings could then be combined into a single column, and the COUNTIF function could be used to identify any entries that appear more than once and must therefore be common to both lists. Computer programs such as MONA [7] and ChemCom [8] may also facilitate this type of molecular searching strategy.

**Table SI-1. 40 approved drugs containing substructures of various D3-like  $\alpha$ -amino acid and dipeptide derivatives.** The drug name (with reference), structure, classification, and therapeutic indication (adapted from DrugBank [9]) are shown.

| # | Compound                  | Structure                                                                           | Classification                                | Indication                                                                           |
|---|---------------------------|-------------------------------------------------------------------------------------|-----------------------------------------------|--------------------------------------------------------------------------------------|
| 1 | Alvimopan [10]            | 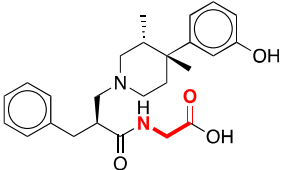   | N-Acyl $\alpha$ -Amino Acid / Synthetic       | Gastrointestinal recovery following bowel resection surgery with primary anastomosis |
| 2 | Atazanavir [11]           |    | N-Acyl $\alpha$ -Amino Acid Amide / Synthetic | HIV-1                                                                                |
| 3 | Bortezomib [12]           |    | N-Acyl Dipeptide Boronic Acid / Synthetic     | Multiple myeloma                                                                     |
| 4 | Ceftaroline Fosamil [13]  |  | N-Acyl Dipeptide (beta-Lactam) / Synthetic    | Bacterial infections                                                                 |
| 5 | Clindamycin [14]          |  | N,N-Dialkyl Amino Acid Amide / Synthetic      | Anaerobic bacteria                                                                   |
| 6 | Clopidogrel (Plavix) [15] |  | N,N-Dialkyl Amino Acid Ester / Synthetic      | Atherosclerotic events                                                               |

|    |                        |                                                                                     |                                                         |                                                                          |
|----|------------------------|-------------------------------------------------------------------------------------|---------------------------------------------------------|--------------------------------------------------------------------------|
| 7  | Cobicistat [16]        | 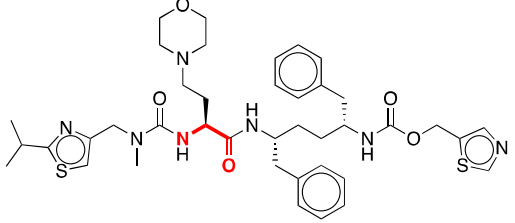   | N-Acyl $\alpha$ -Amino Acid Amide / Synthetic           | HIV                                                                      |
| 8  | Diazepam (Valium) [17] |    | Imino Acid Amide / Synthetic                            | Anxiety disorders, insomnia, anticonvulsant, alcohol withdrawal syndrome |
| 9  | L-DOPA [18]            |    | $\alpha$ -Amino Acid / Natural Product                  | Parkinsonism and dopa-responsive dystonia                                |
| 10 | Doripenem [19]         |   | N-Acyl $\alpha$ -Amino Acid (beta-Lactam) / Synthetic   | Antibiotic                                                               |
| 11 | Enalapril [20]         |  | N-Alkyl Dipeptide, N-Alkyl Amino Acid Ester / Synthetic | Hypertension, congestive heart failure                                   |
| 12 | Folic Acid [21]        |  | N-Acyl $\alpha$ -Amino Acid / Natural Product           | Vitamin B <sub>9</sub>                                                   |
| 13 | Lacosamide [22]        |  | N-Acyl $\alpha$ -Amino Acid Amide / Synthetic           | Epilepsy                                                                 |

|    |                       |                                                                                     |                                                             |                                                                                    |
|----|-----------------------|-------------------------------------------------------------------------------------|-------------------------------------------------------------|------------------------------------------------------------------------------------|
| 14 | Lenalidomide [23]     | 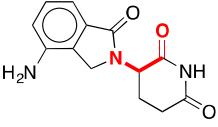   | N-Acyl $\alpha$ -Amino Acid Imide / Synthetic               | Multiple myeloma, some forms of transfusion-dependent anemia                       |
| 15 | Levothyroxine [24]    |    | $\alpha$ -Amino Acid / Natural Product                      | Hypothyroidism, goiter, chronic lymphocytic thyroiditis, myxedema coma, and stupor |
| 16 | Lidocaine [25]        |    | N,N-Dialkyl $\alpha$ -Amino Acid / Synthetic                | Anesthesia                                                                         |
| 17 | Liothyronine [26]     |    | $\alpha$ -Amino Acid / Synthetic                            | Hypothyroidism                                                                     |
| 18 | Lisdexamfetamine [27] |   | $\alpha$ -Amino Acid Amide / Synthetic                      | Attention Deficit/Hyperactivity Disorder                                           |
| 19 | Lisinopril [28]       |  | N-Alkyl Dipeptide, N-Alkyl $\alpha$ -Amino Acid / Synthetic | Hypertension, congestive heart failure                                             |
| 20 | Lopinavir [29]        |  | N-Acyl-Type $\alpha$ -Amino Acid Amide / Synthetic          | HIV                                                                                |

|    |                    |                                                                                     |                                               |                                                            |
|----|--------------------|-------------------------------------------------------------------------------------|-----------------------------------------------|------------------------------------------------------------|
| 21 | Lymecycline [30]   | 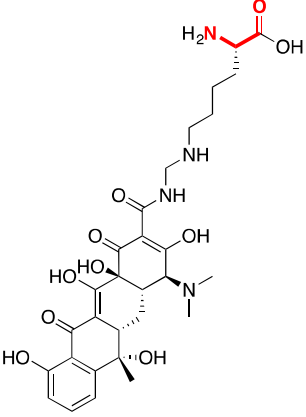   | $\alpha$ -Amino Acid /<br>Synthetic           | Acne, some bacterial infections                            |
| 22 | Melphalan [31]     |    | $\alpha$ -Amino Acid /<br>Synthetic           | Multiple myeloma, epithelial carcinoma of the ovary        |
| 23 | Methotrexate [32]  |   | N-Acyl $\alpha$ -Amino Acid /<br>Synthetic    | Some cancers                                               |
| 24 | Mimosine [33]      |  | $\alpha$ -Amino Acid /<br>Natural Product     | Some cancers                                               |
| 25 | Pemetrexed [34]    |  | N-Acyl $\alpha$ -Amino Acid /<br>Synthetic    | Malignant pleural mesothelioma, non-small cell lung cancer |
| 26 | Penicillamine [35] |  | $\alpha$ -Amino Acid /<br>Synthetic           | Wilson's disease, cystinuria, rheumatoid arthritis         |
| 27 | Penicillin V [36]  |  | N-Acyl Dipeptide (beta-Lactam) /<br>Synthetic | Bacterial infections                                       |

|    |                         |                                                                                     |                                                    |                                          |
|----|-------------------------|-------------------------------------------------------------------------------------|----------------------------------------------------|------------------------------------------|
| 28 | Pomalidomide [37]       | 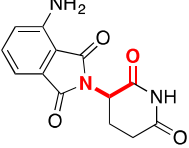   | N-Imido $\alpha$ -Amino Acid Imide / Synthetic     | Multiple myeloma                         |
| 29 | Pralatrexate [38]       |    | N-Acyl $\alpha$ -Amino Acid / Synthetic            | Peripheral T-cell lymphoma               |
| 30 | Raltitrexed [39]        |    | N-Acyl $\alpha$ -Amino Acid / Synthetic            | Malignant neoplasm of colon and rectum   |
| 31 | Ranolazine [40]         |    | N,N-Dialkyl $\alpha$ -Amino Acid Amide / Synthetic | Chronic angina                           |
| 32 | Ritonavir [29]          |   | $\alpha$ -Amino Acid Amide / Synthetic             | HIV                                      |
| 33 | Saxagliptin [41]        |  | $\alpha$ -Amino Acid Amide / Synthetic             | Type 2 diabetes mellitus                 |
| 34 | Tacrolimus [42]         |  | N-Acyl $\alpha$ -Amino Acid Ester / Synthetic      | Organ transplantation, immunosuppression |
| 35 | Tadalafil (Cialis) [43] |  | Cyclic Dipeptide / Synthetic                       | Erectile dysfunction                     |



|    |                     |                                                                                    |                                                      |                                                                                                      |
|----|---------------------|------------------------------------------------------------------------------------|------------------------------------------------------|------------------------------------------------------------------------------------------------------|
| 36 | Thalidomide [44]    | 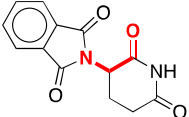  | N-Imido $\alpha$ -Amino<br>Acid Imide /<br>Synthetic | Erythema nodosum<br>leprosum                                                                         |
| 37 | Tigecycline [45]    |   | N-Alkyl $\alpha$ -Amino<br>Acid Amide /<br>Synthetic | Bacterial infections                                                                                 |
| 38 | Valganciclovir [46] |   | $\alpha$ -Amino Acid Ester<br>/ Synthetic            | Cytomegalovirus<br>infections                                                                        |
| 39 | Valsartan [47]      |   | N-Acyl $\alpha$ -Amino<br>Acid / Synthetic           | Hypertension, left<br>ventricular<br>hypertrophy, diabetic<br>nephropathy, other<br>cardiac problems |
| 40 | Ximelagatran [48]   |  | N-Alkyl Dipeptide<br>Amide / Synthetic               | Deep vein thrombosis                                                                                 |

**Table SI-2.** 32 protein drug targets with orthosteric pockets known to bind at least one D3  $\alpha$ -amino acid derivative.

| #  | Target                                                     | Relevant Medical Conditions                                           | Known Ligand(s)                                                         |
|----|------------------------------------------------------------|-----------------------------------------------------------------------|-------------------------------------------------------------------------|
| 1  | Histone deacetylase                                        | Psychiatric and neurological conditions [49]; cancer [50]             | $\alpha$ -Amino acid (acetylated lysine residues [51])                  |
| 2  | Histone lysine methyltransferase G9a                       | Cancer [52]                                                           | $\alpha$ -Amino acid (histone tail lysine residues [53])                |
| 3  | Methionine sulfoxide reductase A                           | Aging [54]                                                            | $\alpha$ -Amino acid (methionine [55])                                  |
| 4  | Dopamine receptor                                          | Parkinson's disease; dopa-responsive dystonia; psychiatric conditions | $\alpha$ -Amino acid metabolite (dopamine)                              |
| 5  | Luciferase                                                 | None                                                                  | $\alpha$ -Amino acid metabolite (luciferin, from cysteine [56])         |
| 6  | Thioredoxin glutathione reductase                          | Schistosomiasis [57]                                                  | Peptide (glutathione) and protein (thioredoxin) [58]                    |
| 7  | Oxytocin receptor                                          | Labor induction [59]                                                  | Peptide (oxytocin) [60]                                                 |
| 8  | GLP-1 receptor                                             | Diabetes mellitus type 2 [61]                                         | Peptide (peptide hormone glucagon-like peptide-1, exendin-4, etc. [62]) |
| 9  | NK1 receptor                                               | Chemotherapy-induced nausea [63]                                      | Peptide [64]                                                            |
| 10 | Polo-like kinase 1 - polo-box domain                       | Cancer [65]                                                           | Peptides [66]                                                           |
| 11 | Ribosomal peptidyl transferase center                      | Bacterial infections                                                  | Peptides [67]                                                           |
| 12 | MAS-related GPR member X1 receptor                         | Chronic pain [68]                                                     | Peptides [69]                                                           |
| 13 | Mitogen-activated protein kinase kinase kinase 3 isoform 1 | Cancer [70]                                                           | Protein [71]                                                            |
| 14 | Peptidylprolyl cis/trans isomerase, NIMA-interacting 1     | Cancer [72]                                                           | Protein residues [72]                                                   |
| 15 | Protein arginine deiminase 4                               | Rheumatoid arthritis [73]                                             | Proteins (arginines) [74]                                               |
| 16 | Ras-converting enzyme                                      | Cancer [75]                                                           | Proteins [76]                                                           |
| 17 | Factor XIa                                                 | Hemophilia C [77]                                                     | Proteins and peptides [78]                                              |
| 18 | Matrix metalloproteinase 2                                 | Cancer [79]                                                           | Proteins and peptides [51]                                              |
| 19 | Calpain                                                    | Alzheimer's disease, stroke, amyotrophy, muscular dystrophy, motor    | Proteins and peptides [80-82]                                           |

|    |                                                                                            |                                                                     |                                                                                                    |
|----|--------------------------------------------------------------------------------------------|---------------------------------------------------------------------|----------------------------------------------------------------------------------------------------|
|    |                                                                                            |                                                                     |                                                                                                    |
| 20 | Cathepsin                                                                                  | Cancer [83], neurodegenerative disorders, rheumatoid arthritis [84] | Proteins and peptides [83]                                                                         |
| 21 | Platelet-activating factor acetylhydrolase 1b, catalytic subunit 2                         | Atherosclerosis [85]                                                | 1-O-alkyl-2-acetyl-sn-glycero-3-phosphocholine (PAF or platelet-activating factor [86])            |
| 22 | Calcium-activated chloride channels (TMEM16A)                                              | Diarrhea [87]                                                       | Cations (Calcium)                                                                                  |
| 23 | Renal outer medullary K <sup>+</sup> channel                                               | Bartter syndrome [88]                                               | Cations (Potassium)                                                                                |
| 24 | Apoptotic protease activating factor 1                                                     | Cancer [89]                                                         | Nucleic acid (ATP) and various protein partners [90]                                               |
| 25 | Heat shock factor-1                                                                        | Cancer [91]                                                         | Nucleic acid (DNA, though the $\alpha$ -amino acid glutamine may increase HSF1 transcription) [92] |
| 26 | Shiga toxin                                                                                | Dysentery [93]                                                      | Nucleic acids [94]                                                                                 |
| 27 | 1,4-dihydroxy-2-naphthoyl-CoA synthase (MenB)                                              | Bacterial infections [95]                                           | O-succinylbenzoyl-CoA [96]                                                                         |
| 28 | Vitamin D receptor                                                                         | Rickets [97]                                                        | Secosteroid [98]                                                                                   |
| 29 | DAF-12                                                                                     | Parasitic helminthes [99]                                           | Steroidal ligand [100]                                                                             |
| 30 | Fibroblast growth factor 22                                                                | Epilepsy [101]                                                      | Uncertain                                                                                          |
| 31 | Dosage-sensitive sex reversal, adrenal hypoplasia critical region, on chromosome X, gene 1 | X-linked adrenal hypoplasia congenital [102]                        | Uncertain                                                                                          |
| 32 | CD81 receptor                                                                              | Hepatitis C [103]                                                   | Various protein partners                                                                           |

|   |                                                                                     |           |                             |          |                         |                                               |
|---|-------------------------------------------------------------------------------------|-----------|-----------------------------|----------|-------------------------|-----------------------------------------------|
| 1 | 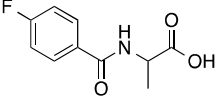   | <b>9</b>  | Unspecified                 | 2787610  | 540299                  | 1,4-dihydroxy-2-naphthoyl-CoA synthase (MenB) |
| 2 |    | <b>10</b> | Unspecified                 | 3153153  | 540299                  | 1,4-dihydroxy-2-naphthoyl-CoA synthase (MenB) |
| 3 |    | <b>11</b> | Unspecified                 | 2787609  | 489031                  | Apoptotic protease activating factor 1        |
| 4 |   | <b>12</b> | S (natural)                 | 2304949  | 588511                  | Calcium-activated chloride channels (TMEM16A) |
| 5 |  | <b>13</b> | S (natural)                 | 44350733 | 46724                   | Calpain                                       |
| 6 |  | <b>14</b> | S (natural),<br>S (natural) | 7299379  | 262308<br>262309        | Calpain                                       |
| 7 |  | <b>15</b> | S (natural),<br>S (natural) | 114619   | 46713<br>50461<br>51388 | Calpain; Cathepsin                            |
| 8 |  | <b>16</b> | S (natural),<br>S (natural) | 15017709 | 51388<br>46714<br>50461 | Calpain; Cathepsin                            |

|    |                                                                                     |           |                             |          |                |               |
|----|-------------------------------------------------------------------------------------|-----------|-----------------------------|----------|----------------|---------------|
| 9  | 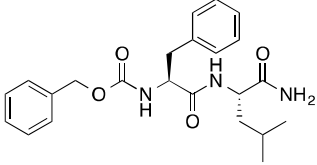   | <b>17</b> | S (natural),<br>S (natural) | 13386706 | 746599         | Cathepsin     |
| 10 |    | <b>18</b> | S (natural),<br>S (natural) | 152128   | 50461<br>51388 | Cathepsin     |
| 11 |    | <b>19</b> | S (natural),<br>S (natural) | 40522013 | 746599         | Cathepsin     |
| 12 |    | <b>20</b> | S (natural),<br>S (natural) | 7020268  | 746599         | Cathepsin     |
| 13 |    | <b>21</b> | S (natural),<br>S (natural) | 7272330  | 51388<br>50461 | Cathepsin     |
| 14 |  | <b>22</b> | S (natural)                 | 10990457 | 37849          | CD81 receptor |
| 15 |  | <b>23</b> | S (natural)                 | 510498   | 42940          | CD81 receptor |
| 16 |  | <b>24</b> | S (natural)                 | 510499   | 42940          | CD81 receptor |
| 17 |  | <b>25</b> | S (natural)                 | 7116346  | 42940          | CD81 receptor |
| 18 |  | <b>26</b> | Unspecified                 | 294891   | 652126         | DAF-12        |

|    |                                                                                     |    |                             |          |                        |                                                                               |
|----|-------------------------------------------------------------------------------------|----|-----------------------------|----------|------------------------|-------------------------------------------------------------------------------|
| 19 | 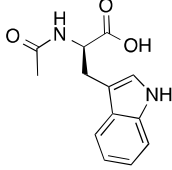   | 27 | R (unnatural)               | 439917   | 652067                 | DAF-12                                                                        |
| 20 |    | 28 | Unspecified                 | 93671    | 50465                  | Dopamine receptor                                                             |
| 21 |    | 29 | Unspecified                 | 2787526  | 50465                  | Dopamine receptor                                                             |
| 22 |    | 30 | Unspecified,<br>Unspecified | 100050   | 798                    | Factor XIa                                                                    |
| 23 |   | 31 | S (natural)                 | 2060890  | 651658<br>588342       | Fibroblast growth factor<br>22; Luciferase                                    |
| 24 |  | 32 | S (natural)                 | 5307679  | 504332                 | Histone lysine<br>methyltransferase G9a                                       |
| 25 |  | 33 | Unspecified                 | 2918890  | 588342<br>2314<br>2315 | Luciferase; Shiga Toxin                                                       |
| 26 |  | 34 | Unspecified                 | 3136528  | 588676<br>1918         | MAS-Related GPR<br>Member X1 receptor;<br>Renal outer medullary K+<br>channel |
| 27 |  | 35 | S (natural)                 | 13746652 | 689654                 | Matrix metalloproteinase<br>2                                                 |

|    |                                                                                     |    |                             |          |                                              |                                                                                                                                                                                  |
|----|-------------------------------------------------------------------------------------|----|-----------------------------|----------|----------------------------------------------|----------------------------------------------------------------------------------------------------------------------------------------------------------------------------------|
| 28 | 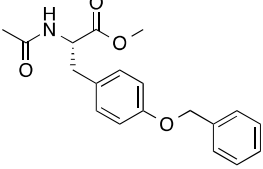   | 36 | S (natural)                 | 71452972 | 689654                                       | Matrix metalloproteinase 2                                                                                                                                                       |
| 29 |    | 37 | Unspecified                 | 2002     | 602163<br>652067<br>504408<br>2563<br>504766 | Methionine sulfoxide reductase A; DAF-12; Heat Shock Factor-1; Ras-converting enzyme; Dosage-sensitive sex reversal, adrenal hypoplasia critical region, on chromosome X, gene 1 |
| 30 |    | 38 | Unspecified                 | 466382   | 1529<br>720706                               | Mitogen-activated protein kinase kinase kinase 3 isoform 1; Ribosomal peptidyl transferase center                                                                                |
| 31 |   | 39 | S (natural),<br>S (natural) | 11100291 | 462888                                       | NK1 receptor                                                                                                                                                                     |
| 32 |  | 40 | Unspecified                 | 44142844 | 2445                                         | Oxytocin receptor                                                                                                                                                                |
| 33 |  | 41 | R (unnatural)               | 14186396 | 474989                                       | Peptidylprolyl cis/trans isomerase, NIMA-interacting 1                                                                                                                           |
| 34 |  | 42 | R (unnatural)               | 45100499 | 474989                                       | Peptidylprolyl cis/trans isomerase, NIMA-interacting 1                                                                                                                           |
| 35 |  | 43 | R (unnatural)               | 45114305 | 474989<br>761669                             | Peptidylprolyl cis/trans isomerase, NIMA-interacting 1                                                                                                                           |
| 36 |  | 44 | R (unnatural)               | 46884012 | 474989                                       | Peptidylprolyl cis/trans isomerase, NIMA-interacting 1                                                                                                                           |

|    |                                                                                     |    |               |          |                  |                                                                    |
|----|-------------------------------------------------------------------------------------|----|---------------|----------|------------------|--------------------------------------------------------------------|
| 37 | 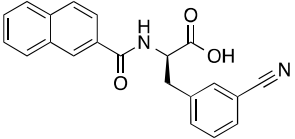   | 45 | R (unnatural) | 46884046 | 474989           | Peptidylprolyl cis/trans isomerase, NIMA-interacting 1             |
| 38 |    | 46 | R (unnatural) | 46884048 | 474989           | Peptidylprolyl cis/trans isomerase, NIMA-interacting 1             |
| 39 |    | 47 | R (unnatural) | 46884050 | 474989           | Peptidylprolyl cis/trans isomerase, NIMA-interacting 1             |
| 40 |    | 48 | R (unnatural) | 46884146 | 474989           | Peptidylprolyl cis/trans isomerase, NIMA-interacting 1             |
| 41 |    | 49 | R (unnatural) | 46884147 | 474989           | Peptidylprolyl cis/trans isomerase, NIMA-interacting 1             |
| 42 |   | 50 | R (unnatural) | 46884149 | 474989           | Peptidylprolyl cis/trans isomerase, NIMA-interacting 1             |
| 43 |  | 51 | Unspecified   | 16327462 | 493034<br>492953 | Platelet-activating factor acetylhydrolase 1b, catalytic subunit 2 |
| 44 |  | 52 | Unspecified   | 2999992  | 492953           | Platelet-activating factor acetylhydrolase 1b, catalytic subunit 2 |
| 45 |  | 53 | Unspecified   | 41410    | 492953<br>493034 | Platelet-activating factor acetylhydrolase 1b, catalytic subunit 2 |
| 46 |  | 54 | Unspecified   | 44601509 | 492953<br>493034 | Platelet-activating factor acetylhydrolase 1b, catalytic subunit 2 |



|    |                                                                                     |    |                             |          |                            |                                                                                             |
|----|-------------------------------------------------------------------------------------|----|-----------------------------|----------|----------------------------|---------------------------------------------------------------------------------------------|
| 47 | 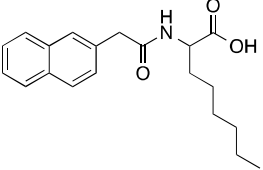   | 55 | Unspecified                 | 44601510 | 493034<br>492953           | Platelet-activating factor acetylhydrolase 1b, catalytic subunit 2                          |
| 48 |    | 56 | S (natural)                 | 16066615 | 492953                     | Platelet-activating factor acetylhydrolase 1b, catalytic subunit 2                          |
| 49 |    | 57 | S (natural)                 | 16066508 | 720504<br>624417<br>720706 | Polo-like kinase 1 - polo-box domain; GLP-1 receptor; Ribosomal peptidyl transferase center |
| 50 |    | 58 | Unspecified                 | 2770855  | 485272                     | Protein arginine deiminase 4                                                                |
| 51 |   | 59 | Unspecified,<br>Unspecified | 646621   | 2314<br>652051<br>652048   | Shiga toxin; Dopamine receptor                                                              |
| 52 |  | 60 | S (natural)                 | 9439964  | 2315<br>588342             | Shiga toxin; Luciferase                                                                     |
| 53 |  | 61 | Unspecified                 | 564251   | 485364                     | Thioredoxin glutathione reductase                                                           |
| 54 |  | 62 | Unspecified                 | 299354   | 504847                     | Vitamin D receptor                                                                          |
